# Supplementary material for: Self-assembled multilayer surfaces of highly fluorescent spirobifluorene-based dye for label-free protein recognition
Source: Royal Society of Chemistry journal article supplement (doi:10.1039/c9tb00854c), 2019-01-01
Supplement: c9tb00854c1.pdf [file c9tb00854c1.pdf]

## ELECTRONIC SUPPLEMENTARY INFORMATION

### Self-assembled multilayer surfaces of highly fluorescent spirobifluorene-based dye for label-free protein recognition

*Friederike Schlüter,<sup>a,b</sup> Bart Jan Ravoo<sup>a,b,\*</sup> and Fabio Rizzo<sup>a,b,c\*</sup>*

*\* Corresponding author*

<sup>a</sup> Organic Chemistry Institute, Westfälische Wilhelms-Universität Münster, Corrensstraße 40, 48149, Münster, Germany.

<sup>b</sup> Center for Soft Nanoscience, Westfälische Wilhelms-Universität Münster, Busso-Peus-Straße 10, 48149 Münster, Germany.

<sup>c</sup> Institute of Molecular Science and Technologies (ISTM) and INSTM, National Research Council (CNR), via Golgi 19, 20133 Milano, Italy.

*Email: [bj.ravoo@uni-muenster.de](mailto:bj.ravoo@uni-muenster.de)*

*[fabio.rizzo@cnr.it](mailto:fabio.rizzo@cnr.it)*

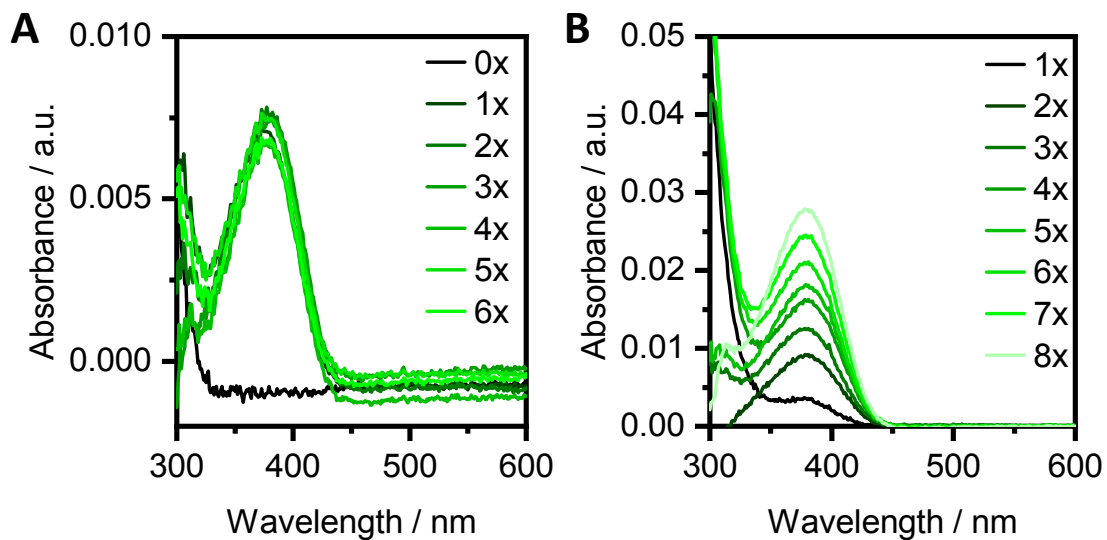

**Figure S1.** Absorption spectra of functionalized glass surfaces. **A:** LbL-functionalization with PDADMAC /dye 1. **B:** LbL-functionalization with p(VBTMA)Cl /dye 1.

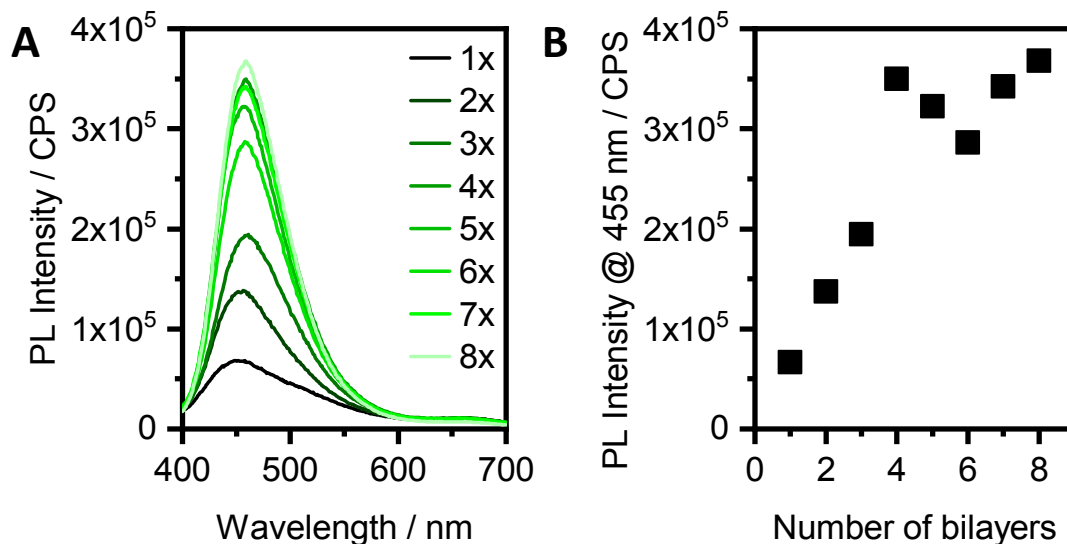

**Figure S2.** Photoluminescence spectra of glass surfaces functionalized with one to seven p(VBTMA)Cl/dye 1 bilayers (A) and the fluorescence maxima at 455 nm plotted against the number of bilayers (B).

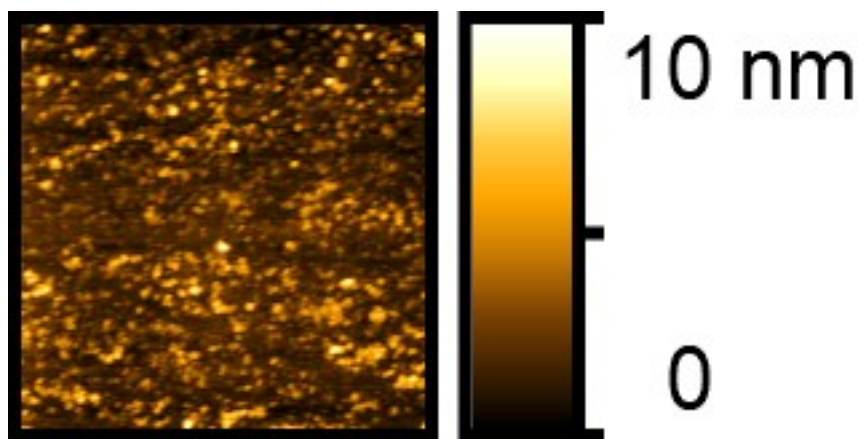

**Figure S3.** AFM analysis of activated glass surface.

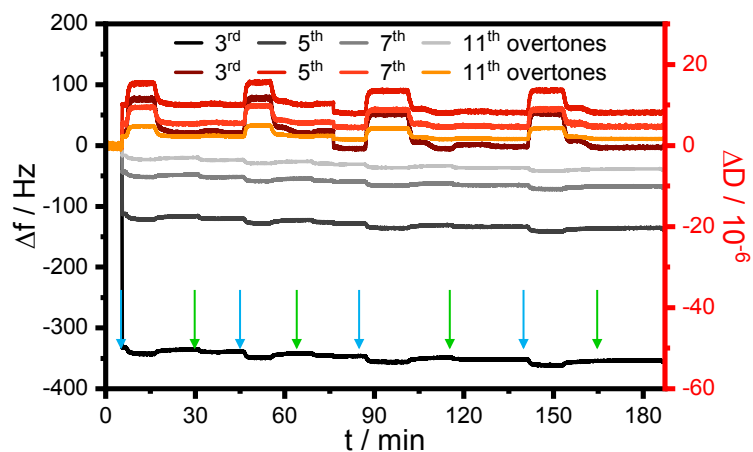

**Figure S4.** QCM-D measurements of the multilayer formation with p(VBTMA)Cl and dye **1** at 23 °C. Arrows indicate the starting point of incubation with p(VBTMA)Cl (blue) and **1** (green).

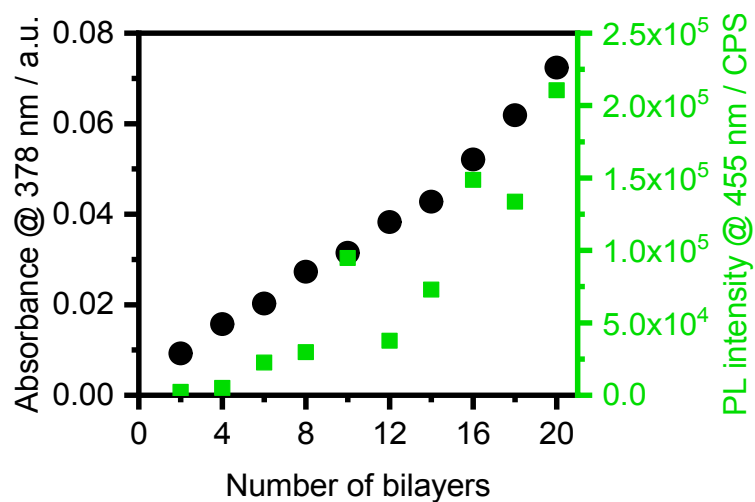

**Figure S5.** Photophysical analysis of multilayer containing p(VBTMA)Cl and dye **1** formed in a fast deposition process (1 min as incubation time). **Black:** Absorbance maxima at 378 nm. **Green:** PL Intensity at 455 nm.

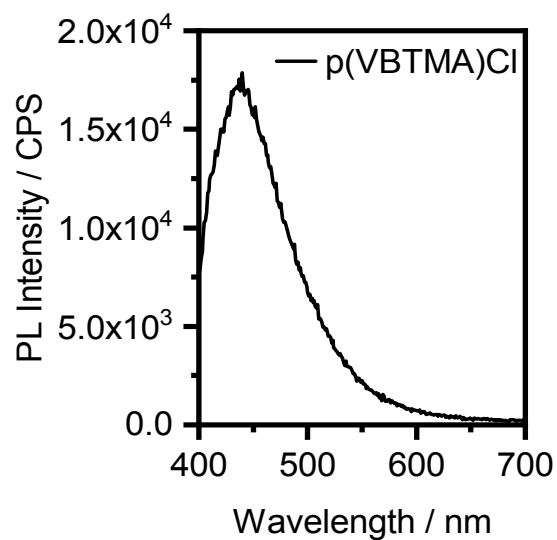

**Figure S6.** Photoluminescence spectrum of one layer of p(VBTMA)Cl on quartz substrate.

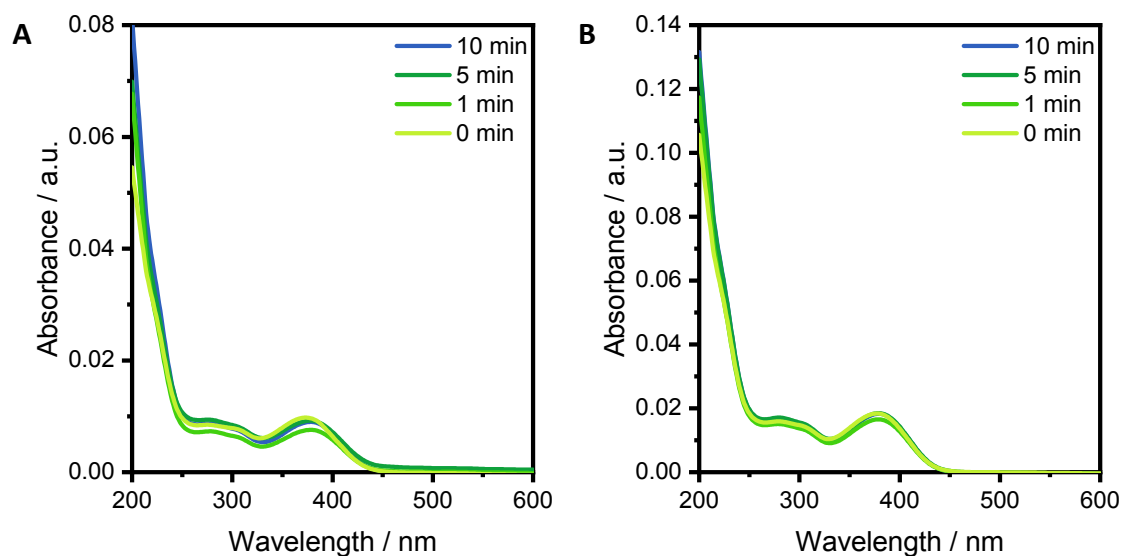

**Figure S7.** Absorption spectra of four (A) and seven (B) bilayers of p(VBTMA)Cl/dye 1 incubated with aqueous solution of BSA (1 mM) for 1, 5 or 10 min.

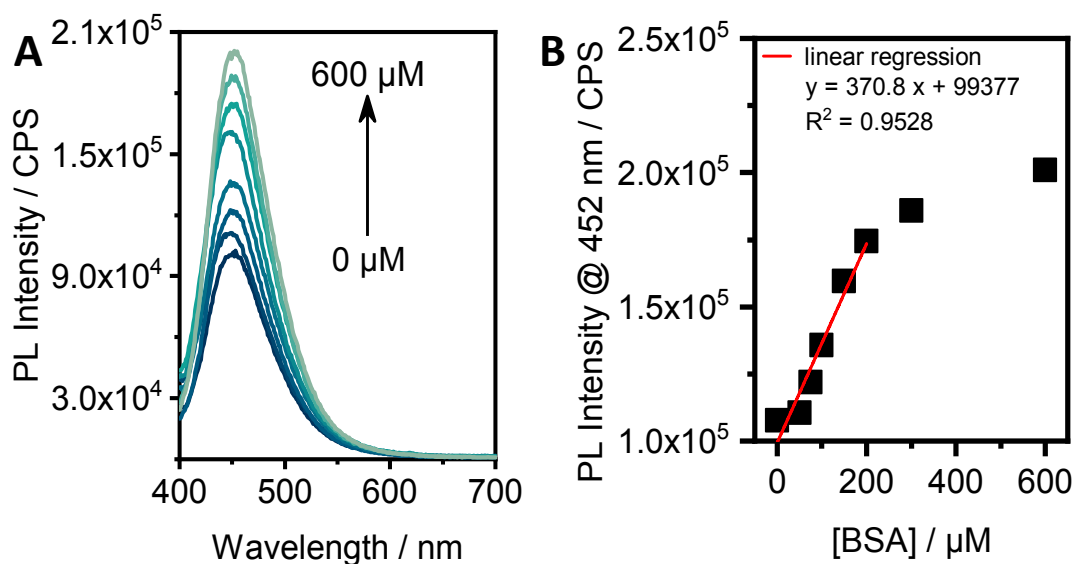

**Figure S8:** Photophysical analysis of the concentration-dependent response of surfaces functionalized with four bilayers of p(VBTMA)Cl/dye 1 to BSA solutions with various concentrations (0  $\mu\text{M}$  – 600  $\mu\text{M}$ ). **A:** Photoluminescence Spectra; **B:** Photoluminescence maxima at 452 nm plotted against the concentration of BSA. The linear region of the graph is fitted with a linear regression (red) for the determination of the LOD.

**Table S1.** Fluorescence lifetimes ( $\tau$ ) recorded for p(VBTMA)Cl /dye **1** functionalized surfaces and one, four or seven bilayers and incubation with an aqueous BSA solution (1 mM) for 1, 5 or 10 min respectively.

| Layer;<br>BSA | $\tau$<br>ns                        | $\tau_{Av}^a$<br>ns |
|---------------|-------------------------------------|---------------------|
| 0x; 10 min    | 21.1 (33%); 6.28 (52%); 2.00 (15%)  | 5.74                |
| 1x; 1 min     | 10.0 (36%); 2.86 (64%)              | 5.46                |
| 1x; 5 min     | 18.73 (20%); 5.72 (51%); 1.64 (29%) | 7.12                |
| 1x; 10 min    | 21.1 (13%); 6.38 (49%); 2.05 (38%)  | 6.60                |
| 4x; 1 min     | 25.12 (8%); 6.77 (48%); 1.96 (44%)  | 6.07                |
| 4x; 5 min     | 22.41 (14%); 6.67 (52%); 1.98 (34%) | 7.21                |
| 4x; 10 min    | 25.34 (12%); 7.57 (49%); 2.34 (39%) | 7.62                |
| 7x; 1 min     | 21.99 (15%); 6.45 (52%); 1.78 (33%) | 7.28                |
| 7x; 5 min     | 23.28 (11%); 6.61 (55%); 1.99 (34%) | 6.80                |
| 7x; 10 min    | 22.02 (12%); 6.50 (46%); 1.95 (42%) | 6.41                |

All  $\tau$  recorded with excitation at 376 nm and detection at 460 nm. Analysis by tail fit between 6.5 – 60 ns. <sup>a</sup>Amplitude weighted.

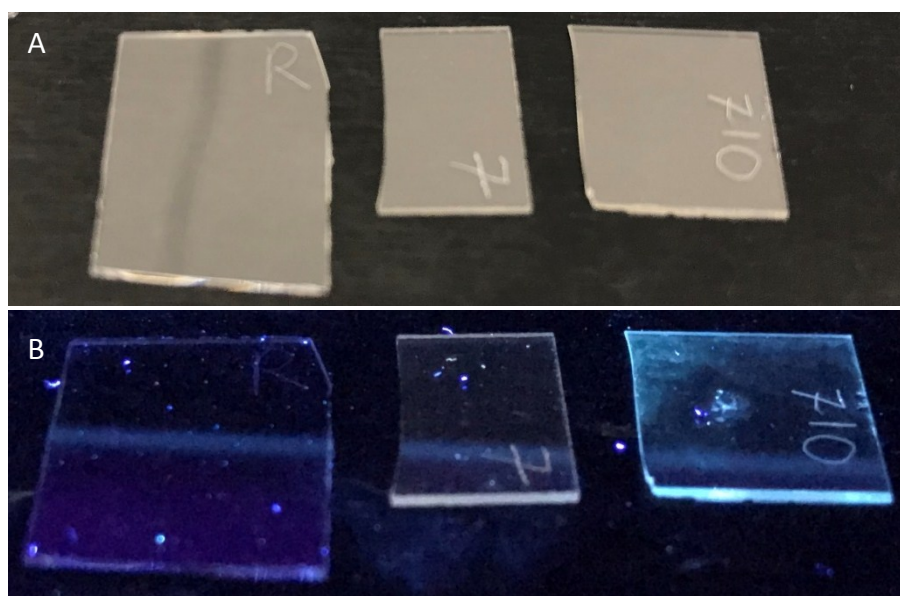

**Figure S9.** Photographic images of surfaces. **A:** Daylight. **B:** Excitation with 366 nm. **Left:** Bare Quartz. **Middle:** Quartz surface with seven bilayers p(VBTMA)Cl /dye **1**. **Right:** Quartz surface with seven bilayers p(VBTMA)Cl /dye **1** incubated with BSA for 10 min.
